# Supplementary material
Source: Springer Nature journal article supplement (https://www.springermedizin.de/resource/supplementary/12968_2010_1455_MOESM11_ESM.pdf/9581202)

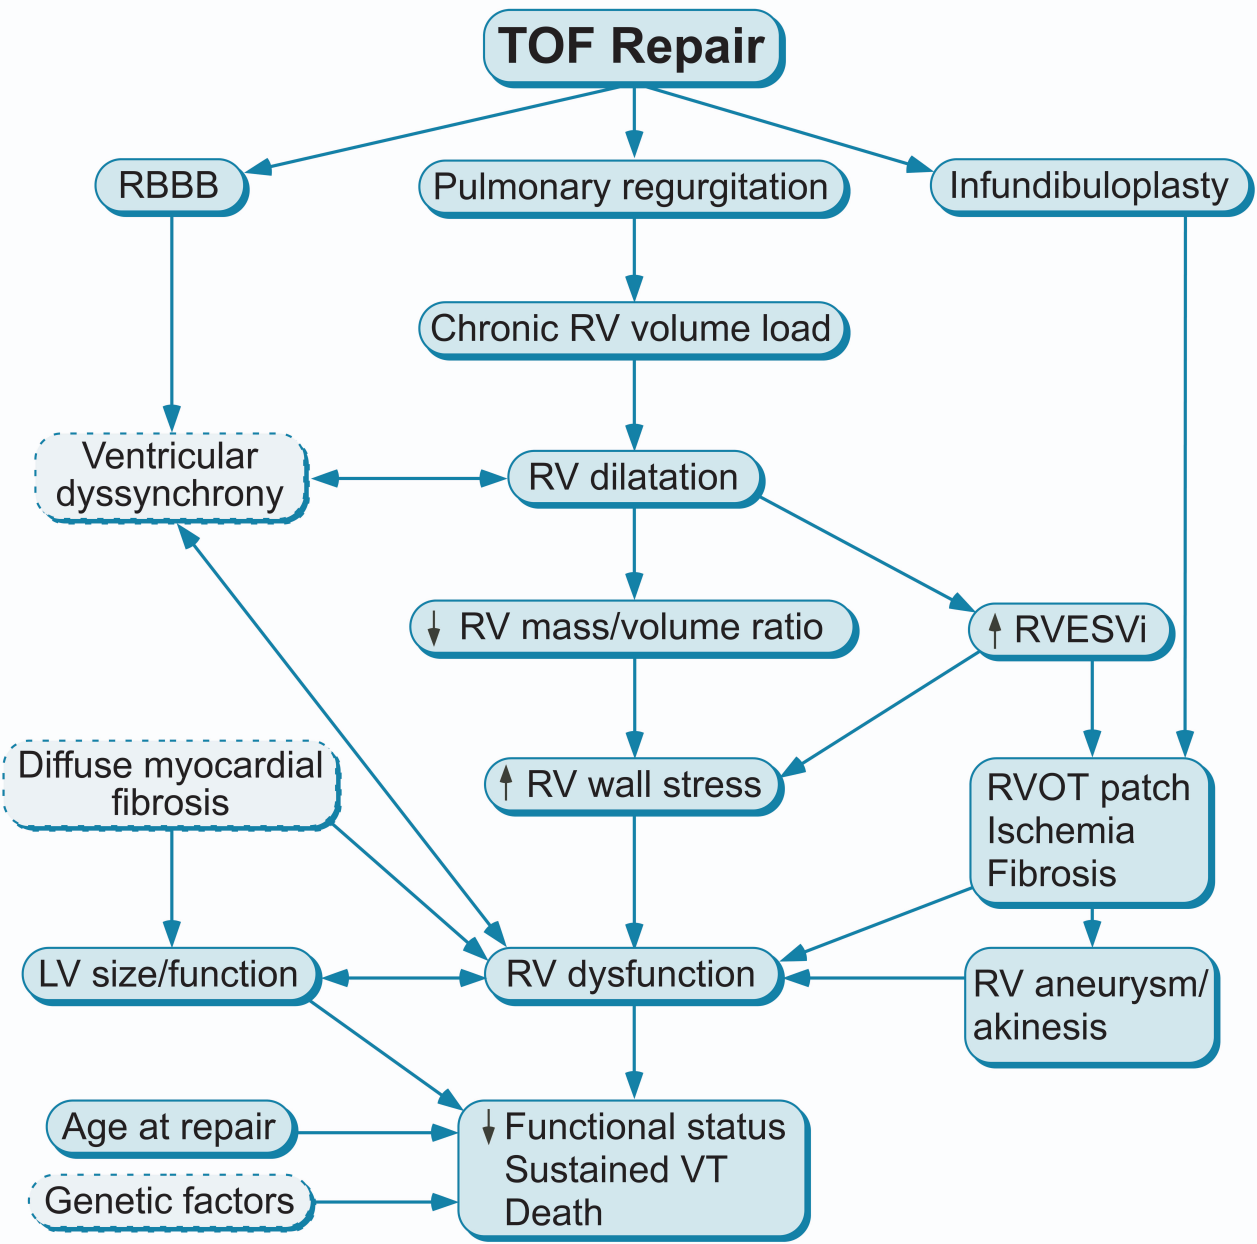

Supplement: MOESM11 [file 9581202]
